# Supplementary material for: Structure-controlled growth of vertically-aligned carbon nanotube forests using iron–nickel bimetallic catalysts
Source: Royal Society of Chemistry journal article supplement (doi:10.1039/d0ma00826e), 2021-01-01
Supplement: d0ma00826e1.pdf [file d0ma00826e1.pdf]

### Supporting Information

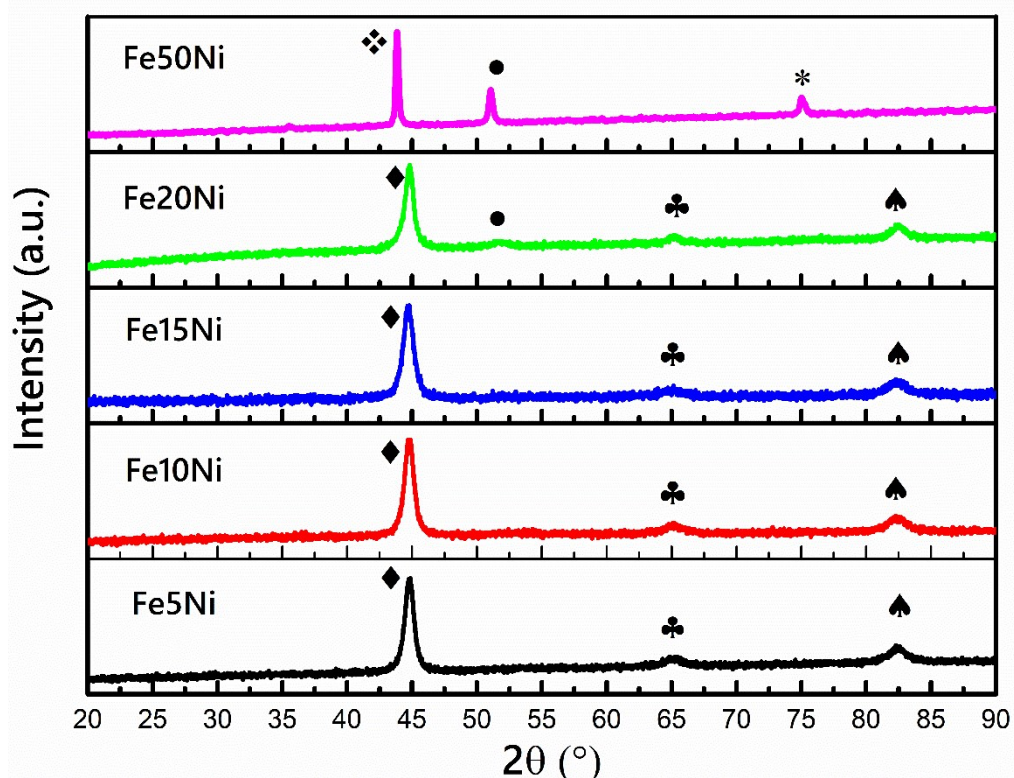

**Fig.S 1.** XRD results of synthesized Fe-Ni powders by mechanical alloying at different weight ratio.

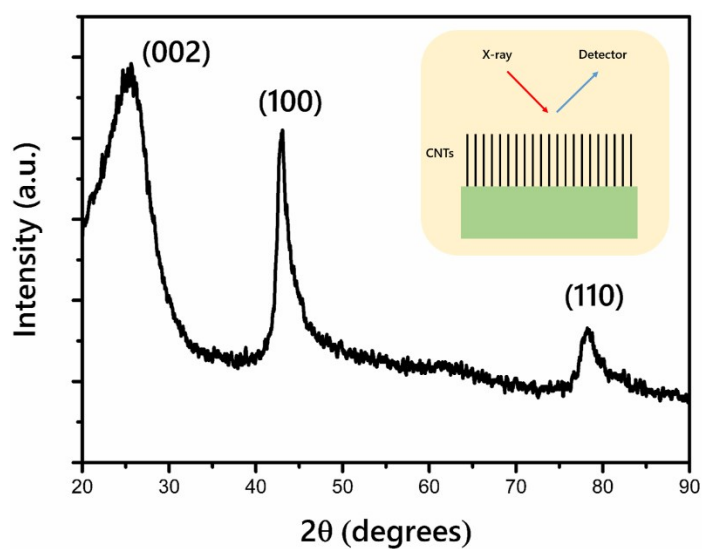

**Fig.S 2.** XRD pattern of VACNTs.

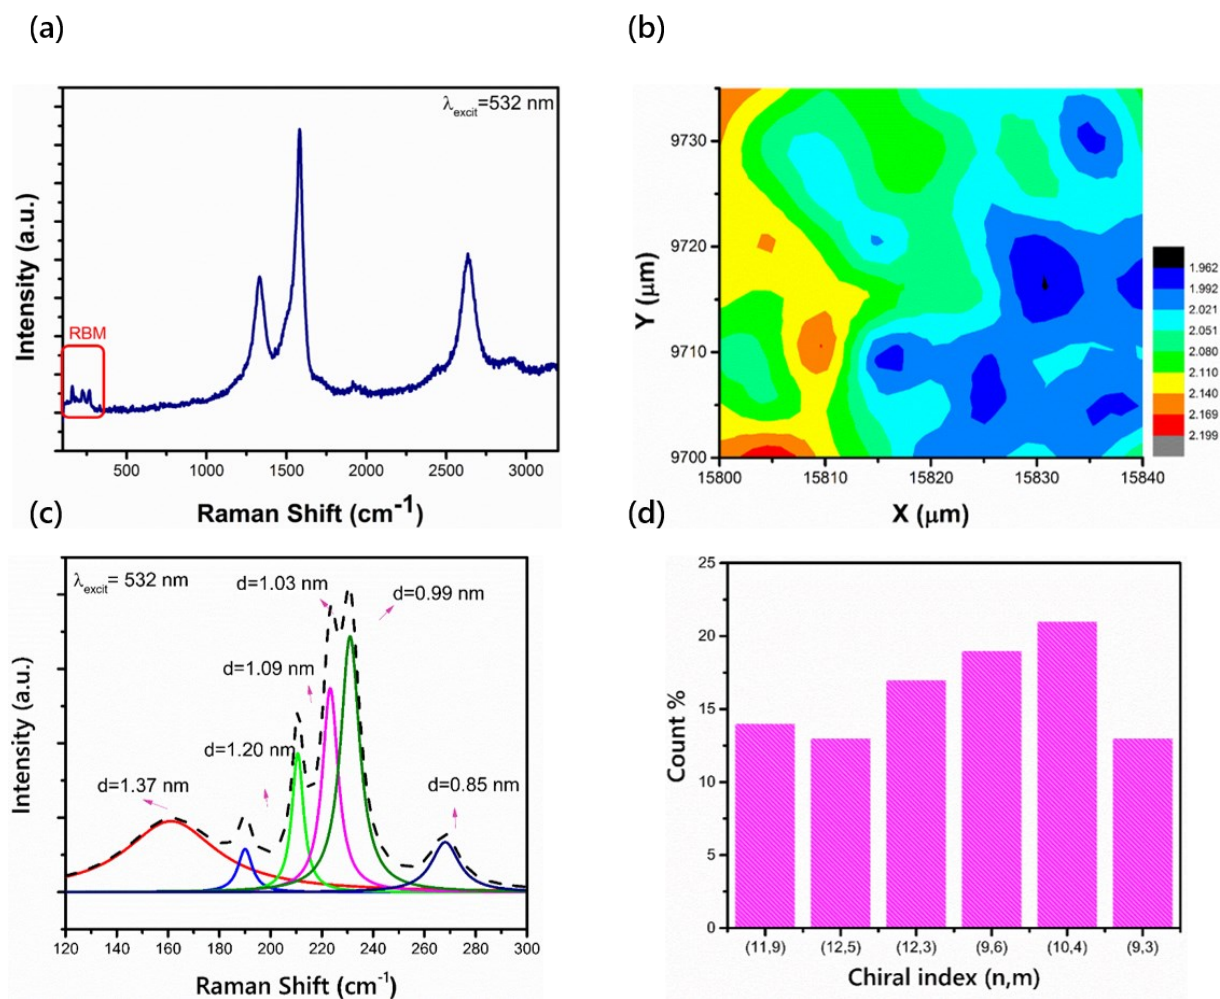

**Fig.S 3.** The results of VACNTs synthesized on the pure-Fe nanoparticles (a) full Raman spectra, (b) Raman mapping result for  $1600 \mu\text{m}^2$  area, (c) RBM peaks fitted with Lorentz and calculation of VACNTs innermost diameter, (d) the calculation and distribution of chiral index of VACNTs with electronic bands.

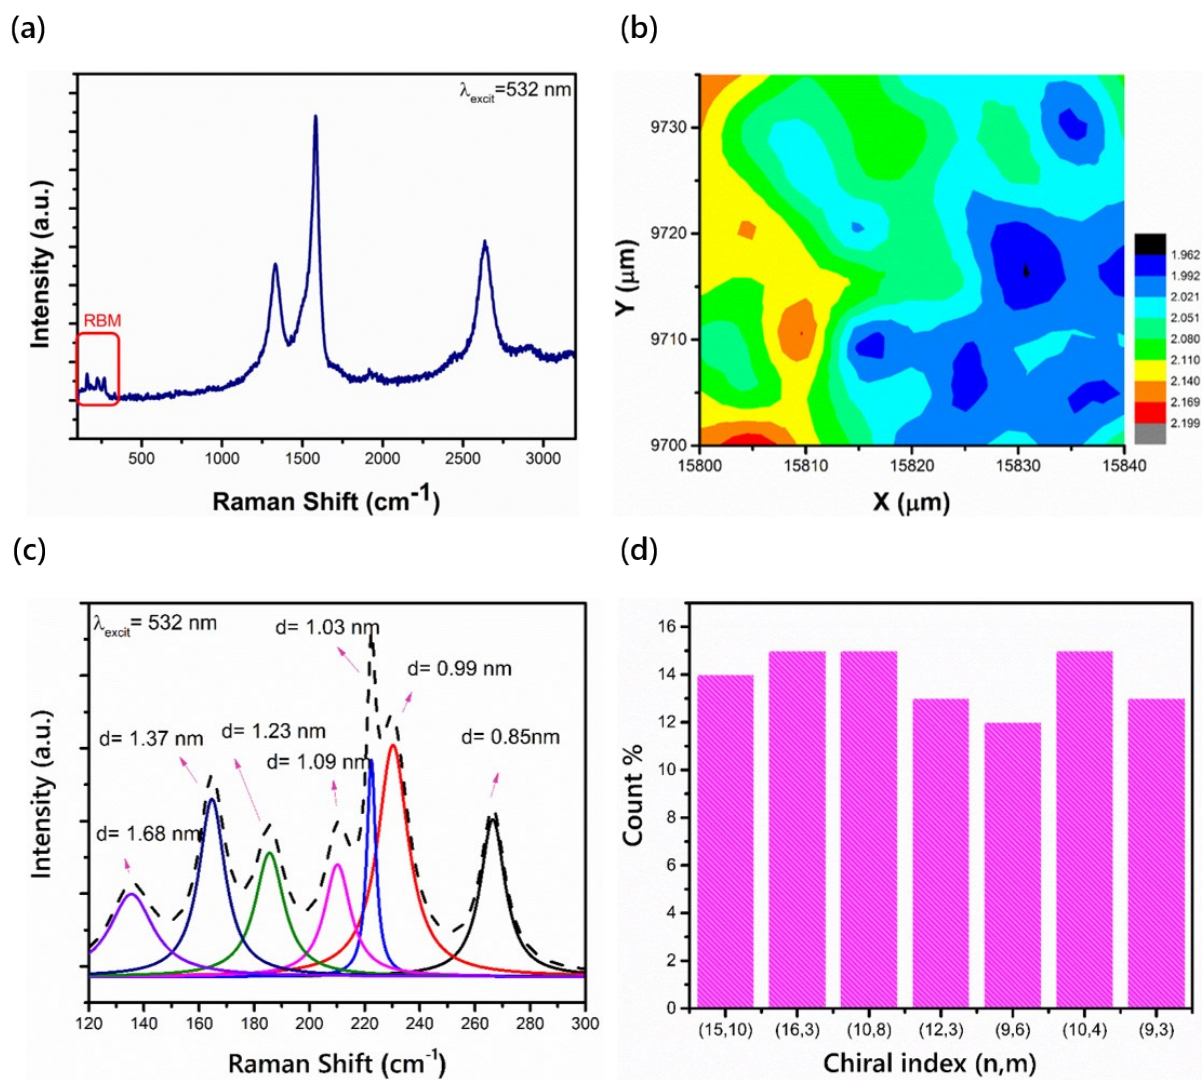

**Fig.S 4.** The results of VACNTs synthesized on the Fe<sub>5</sub>Ni nanoparticles (a) full Raman spectra, (b) Raman mapping result for 1600  $\mu\text{m}^2$  area, (c) RBM peaks fitted with Lorentz and calculation of VACNTs innermost diameter, (d) the calculation and distribution of chiral index of VACNTs with electronic bands.

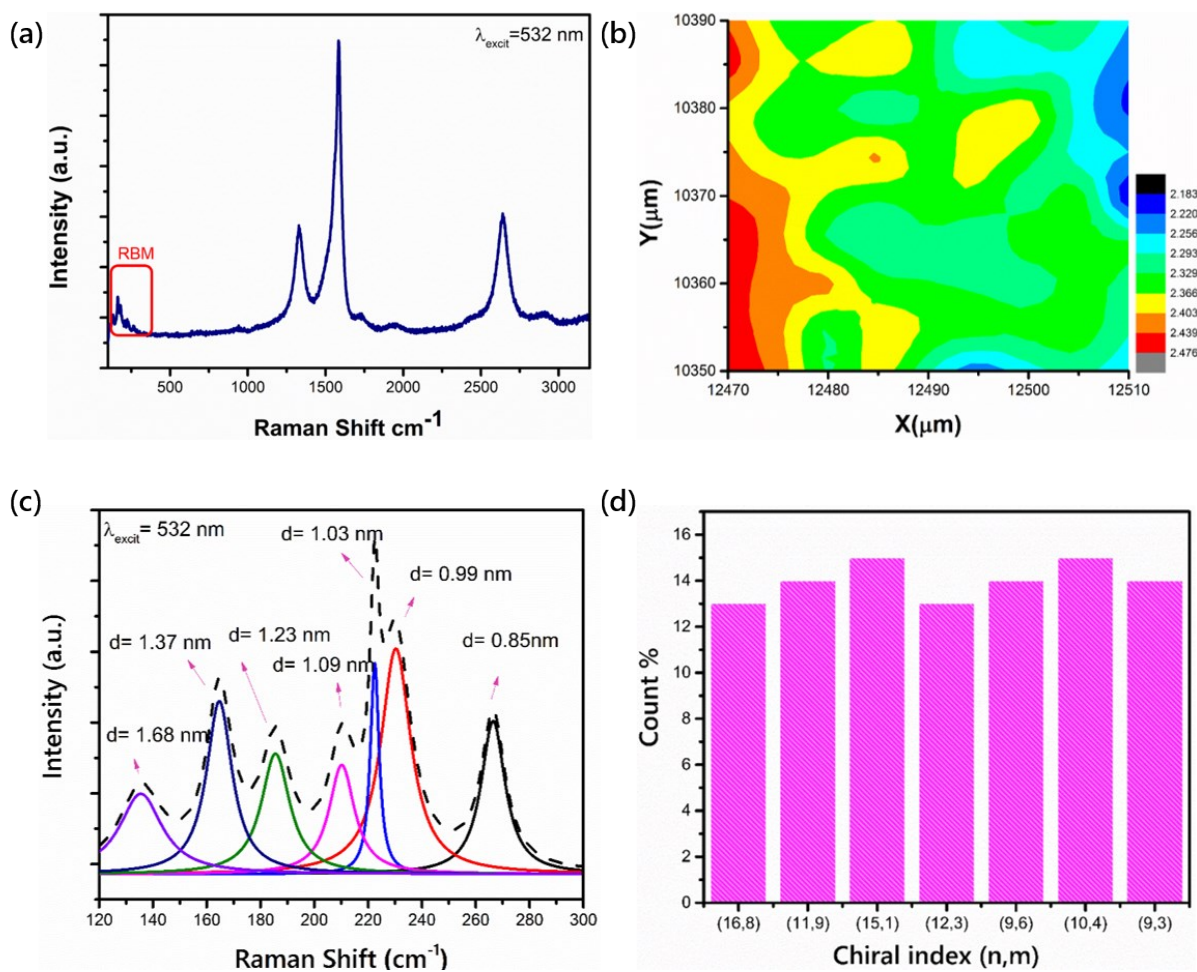

**Fig.S 5.** The results of VACNTs synthesized on the Fe<sub>10</sub>Ni nanoparticles (a) full Raman spectra, (b) Raman mapping result for 1600  $\mu\text{m}^2$  area, (c) RBM peaks fitted with Lorentz and calculation of VACNTs innermost diameter, (d) the calculation and distribution of chiral index of VACNTs with electronic bands.

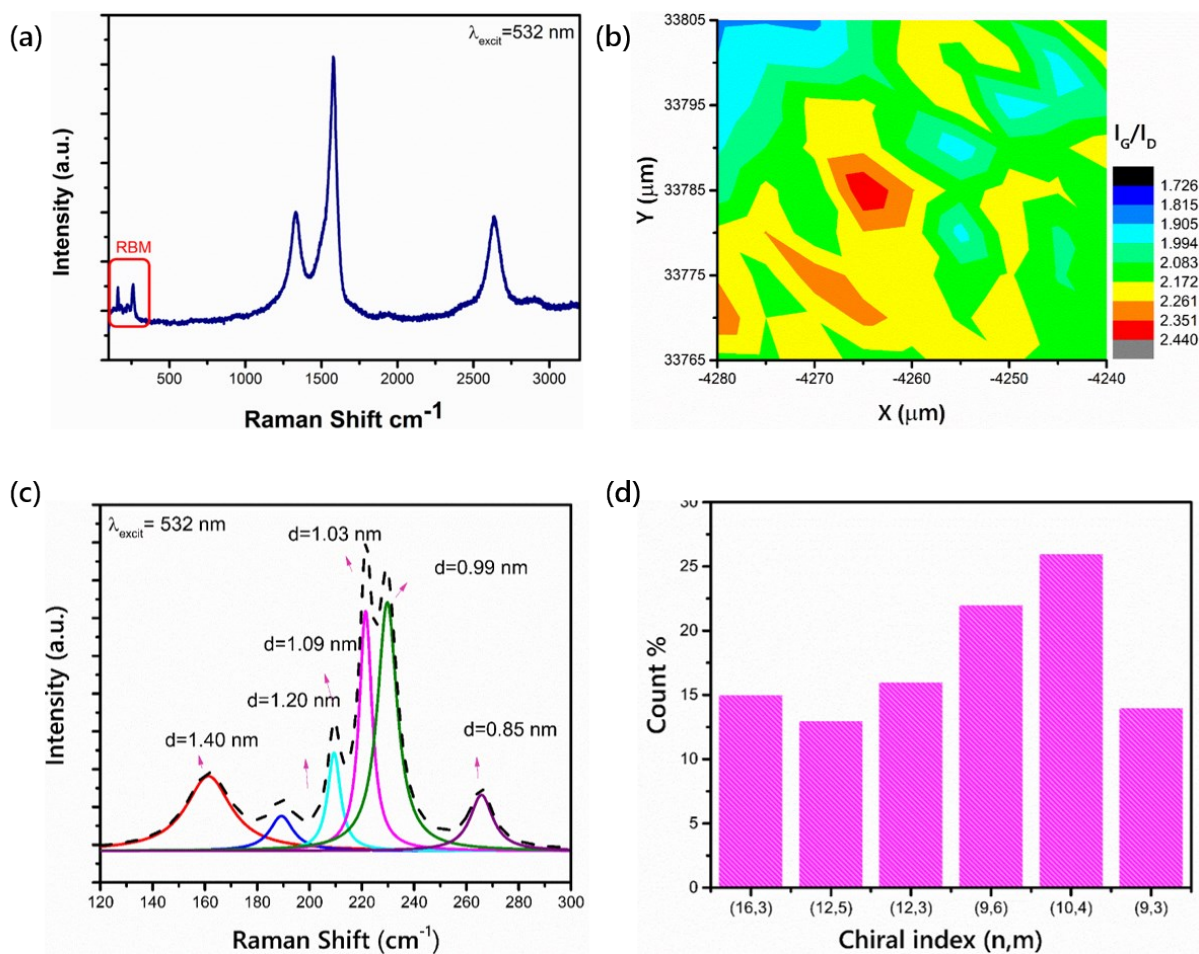

**Fig.S 6.** The results of VACNTs synthesized on the Fe<sub>15</sub>Ni nanoparticles (a) full Raman spectra, (b) Raman mapping result for 1600  $\mu\text{m}^2$  area, (c) RBM peaks fitted with Lorentz and calculation of VACNTs innermost diameter, (d) the calculation and distribution of chiral index of VACNTs with electronic bands.

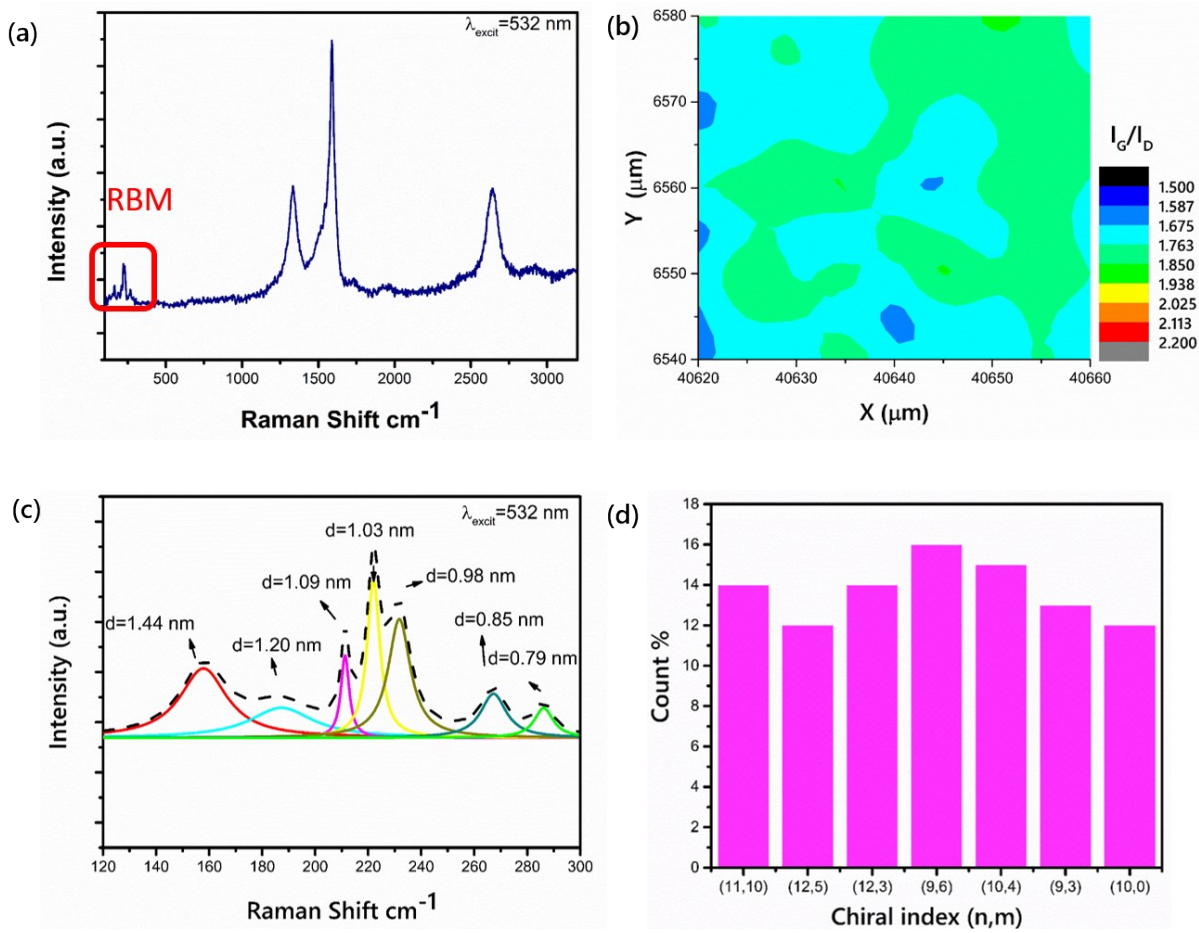

**Fig.S 7.** The results of VACNTs synthesized on the Fe<sub>20</sub>Ni nanoparticles (a) full Raman spectra, (b) Raman mapping result for 1600  $\mu\text{m}^2$  area, (c) RBM peaks fitted with Lorentz and calculation of VACNTs innermost diameter, (d) the calculation and distribution of chiral index of VACNTs with electronic bands.

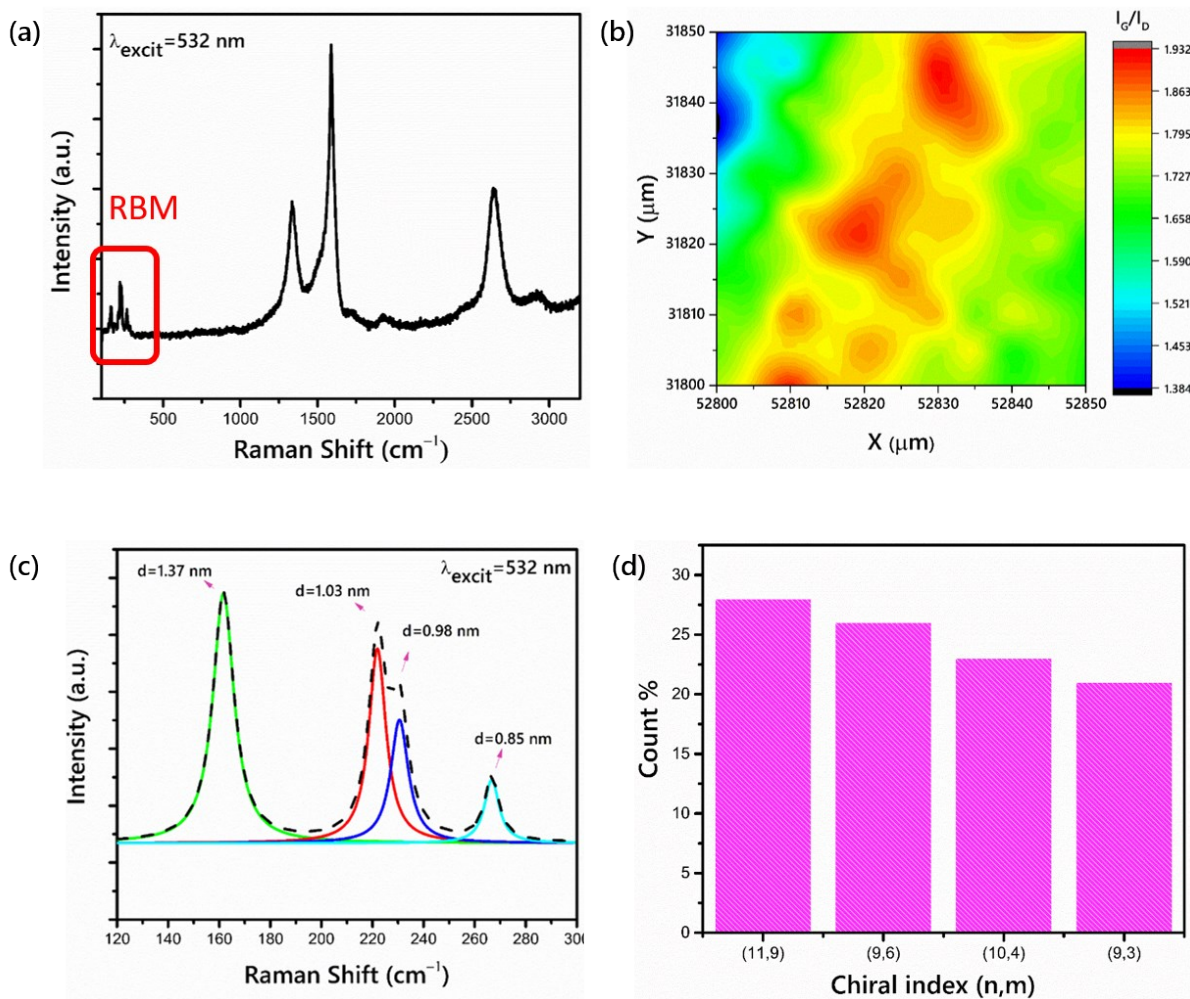

**Fig.S 8.** The results of VACNTs synthesized on the Fe<sub>50</sub>Ni nanoparticles (a) full Raman spectra, (b) Raman mapping result for 1600  $\mu\text{m}^2$  area, (c) RBM peaks fitted with Lorentz and calculation of VACNTs innermost diameter, (d) the calculation and distribution of chiral index of VACNTs with electronic bands.

**Table S 1:** RBM shift of synthesized VACNTs by Fe and Fe-Ni alloy combinations for green laser spot (2.33 eV, 532 nm) used in all calculations ( $\omega_{RBM}$ : Mean value from 121 spectra) [35,51,52].

| Catalyst type                                                                                                                          | $\omega_{RBM}$ (cm <sup>-1</sup> ) | (n, m)  | Family (2n+m) | d (nm) | S or M | $E_{GAP}$ | $E_{II}$ | Electronic band                                        |
|----------------------------------------------------------------------------------------------------------------------------------------|------------------------------------|---------|---------------|--------|--------|-----------|----------|--------------------------------------------------------|
| Fe-only                                                                                                                                | 165                                | (11,9)  | 31            | 1.37   | S      | 0.61      | 1.81     | ○                                                      |
|                                                                                                                                        | 187                                | (12,5)  | 29            | 1.20   | S      | 0.70      | 2.08     | ○                                                      |
|                                                                                                                                        | 208                                | (12,3)  | 27            | 1.09   | M      | -         | 2.29     | ▲                                                      |
|                                                                                                                                        | 220                                | (9,6)   | 24            | 1.03   | M      | -         | 2.41     | ▲                                                      |
|                                                                                                                                        | 229                                | (10,4)  | 24            | 0.99   | M      | -         | 2.52     | ▲                                                      |
|                                                                                                                                        | 267                                | (9,3)   | 21            | 0.85   | M      | -         | 2.91     | ▲                                                      |
| Fe5Ni                                                                                                                                  | 131                                | (15,10) | 40            | 1.73   | S      | 0.50      | 1.93     | ◻                                                      |
|                                                                                                                                        | 162                                | (16,3)  | 35            | 1.40   | S      | 0.60      | 1.78     | ○                                                      |
|                                                                                                                                        | 182                                | (10,8)  | 28            | 1.24   | S      | 0.67      | 2.02     | ○                                                      |
|                                                                                                                                        | 208                                | (12,3)  | 27            | 1.09   | M      | -         | 2.29     | ▲                                                      |
|                                                                                                                                        | 220                                | (9,6)   | 24            | 1.03   | M      | -         | 2.41     | ▲                                                      |
|                                                                                                                                        | 229                                | (10,4)  | 24            | 0.99   | M      | -         | 2.52     | ▲                                                      |
| Fe10Ni                                                                                                                                 | 267                                | (9,3)   | 21            | 0.85   | M      | -         | 2.91     | ▲                                                      |
|                                                                                                                                        | 135                                | (16,8)  | 40            | 1.68   | S      | 0.49      | 1.98     | ◻                                                      |
|                                                                                                                                        | 164                                | (11,9)  | 31            | 1.37   | S      | 0.61      | 1.81     | ○                                                      |
|                                                                                                                                        | 185                                | (15,1)  | 31            | 1.23   | S      | 0.68      | 2.03     | ○                                                      |
|                                                                                                                                        | 208                                | (12,3)  | 27            | 1.09   | M      | -         | 2.29     | ▲                                                      |
|                                                                                                                                        | 220                                | (9,6)   | 24            | 1.03   | M      | -         | 2.41     | ▲                                                      |
| Fe15Ni                                                                                                                                 | 230                                | (10,4)  | 24            | 0.99   | M      | -         | 2.52     | ▲                                                      |
|                                                                                                                                        | 266                                | (9,3)   | 21            | 0.85   | M      | -         | 2.91     | ▲                                                      |
|                                                                                                                                        | 162                                | (16,3)  | 35            | 1.40   | S      | 0.60      | 1.78     | ○                                                      |
|                                                                                                                                        | 187                                | (12,5)  | 29            | 1.20   | S      | 0.70      | 2.08     | ○                                                      |
|                                                                                                                                        | 208.                               | (12,3)  | 27            | 1.09   | M      | -         | 2.29     | ▲                                                      |
|                                                                                                                                        | 220                                | (9,6)   | 24            | 1.03   | M      | -         | 2.41     | ▲                                                      |
| Fe20Ni                                                                                                                                 | 229                                | (10,4)  | 24            | 0.99   | M      | -         | 2.52     | ▲                                                      |
|                                                                                                                                        | 267                                | (9,3)   | 21            | 0.85   | M      | -         | 2.91     | ▲                                                      |
|                                                                                                                                        | 157                                | (11,10) | 32            | 1.44   | S      | 0.58      | 1.73     | ○                                                      |
|                                                                                                                                        | 188                                | (12,5)  | 29            | 1.20   | S      | 0.70      | 2.08     | ○                                                      |
|                                                                                                                                        | 210                                | (12,3)  | 27            | 1.09   | M      | -         | 2.29     | ▲                                                      |
|                                                                                                                                        | 221                                | (9,6)   | 24            | 1.03   | M      | -         | 2.41     | ▲                                                      |
| Fe50Ni                                                                                                                                 | 231                                | (10,4)  | 24            | 0.98   | M      | -         | 2.52     | ▲                                                      |
|                                                                                                                                        | 267                                | (9,3)   | 21            | 0.85   | M      | -         | 2.91     | ▲                                                      |
|                                                                                                                                        | 286                                | (10,0)  | 20            | 0.79   | S      | 1.06      | 2.11     | ▲                                                      |
|                                                                                                                                        | 165                                | (11,9)  | 31            | 1.37   | S      | 0.61      | 1.81     | ○                                                      |
|                                                                                                                                        | 220                                | (9,6)   | 24            | 1.03   | M      | -         | 2.41     | ▲                                                      |
|                                                                                                                                        | 229                                | (10,4)  | 24            | 0.98   | M      | -         | 2.52     | ▲                                                      |
| $M_{11} = 6i\gamma_0/d_t$ , $S_{22} = 4i\gamma_0/d_t$ , $S_{33} = 8i\gamma_0/d_t$<br>$S_{44} = 16i\gamma_0/d_t$ , $E_{GAP} = 0.84/d_t$ |                                    |         |               |        |        |           |          | $M_{11}$ : ▲ $S_{22}$ : ●<br>$S_{33}$ : ○ $S_{44}$ : ◻ |



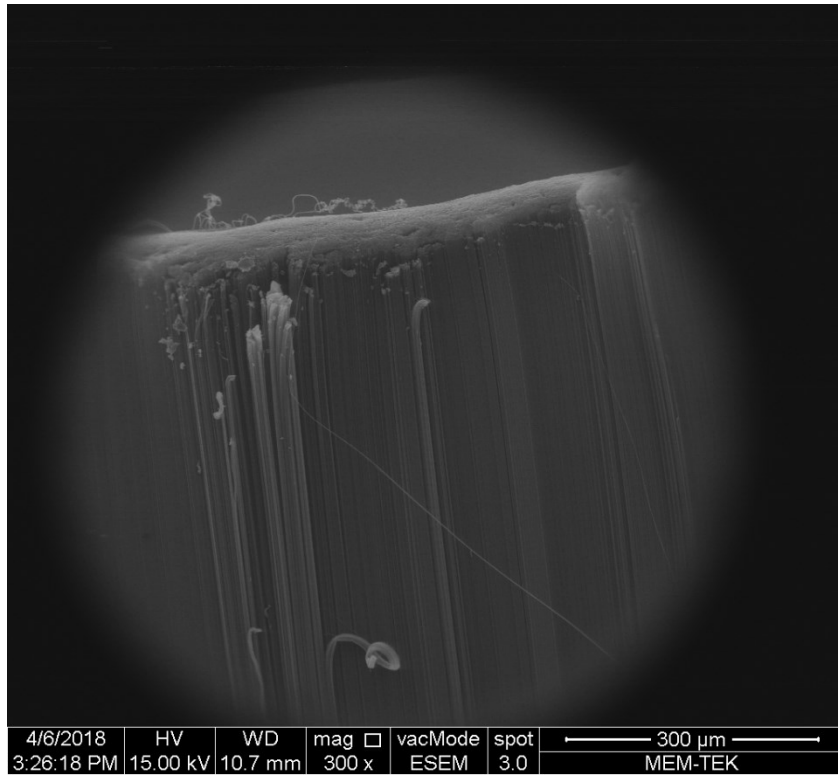

**Fig.S 9:** SEM image from top of VACNTs synthesized on the pure-Fe.

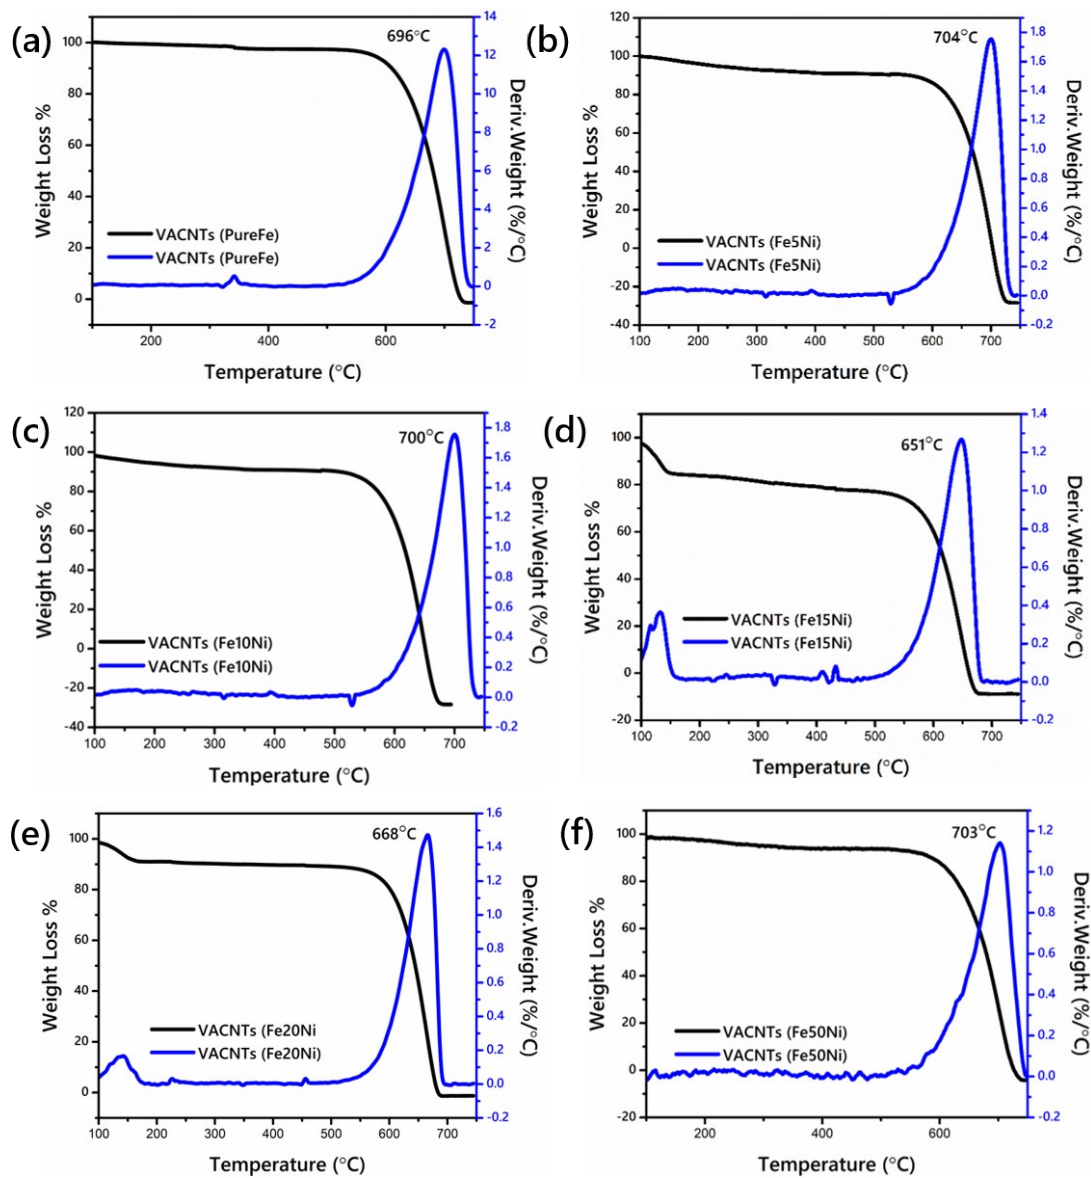

**Fig.S 10:** TGA curves of synthesized VACNTs on (a) pure-Fe, ( b) Fe5Ni, (c) Fe10Ni, (d) Fe15Ni, (e) Fe20Ni and (f) Fe50Ni.
